# Supplementary material for: A tissue-specific, Gata6-driven transcriptional program instructs remodeling of the mature arterial tree
Source: PubMed Central journal article supplement (PMC5630260; doi:10.7554/elife.31362), 2017-09-27
Supplement: elife-31362-supp5.pdf [file elife-31362-supp5.pdf]

# Quality control and alignment:

Input: Illumina HiSeq 2500 short reads

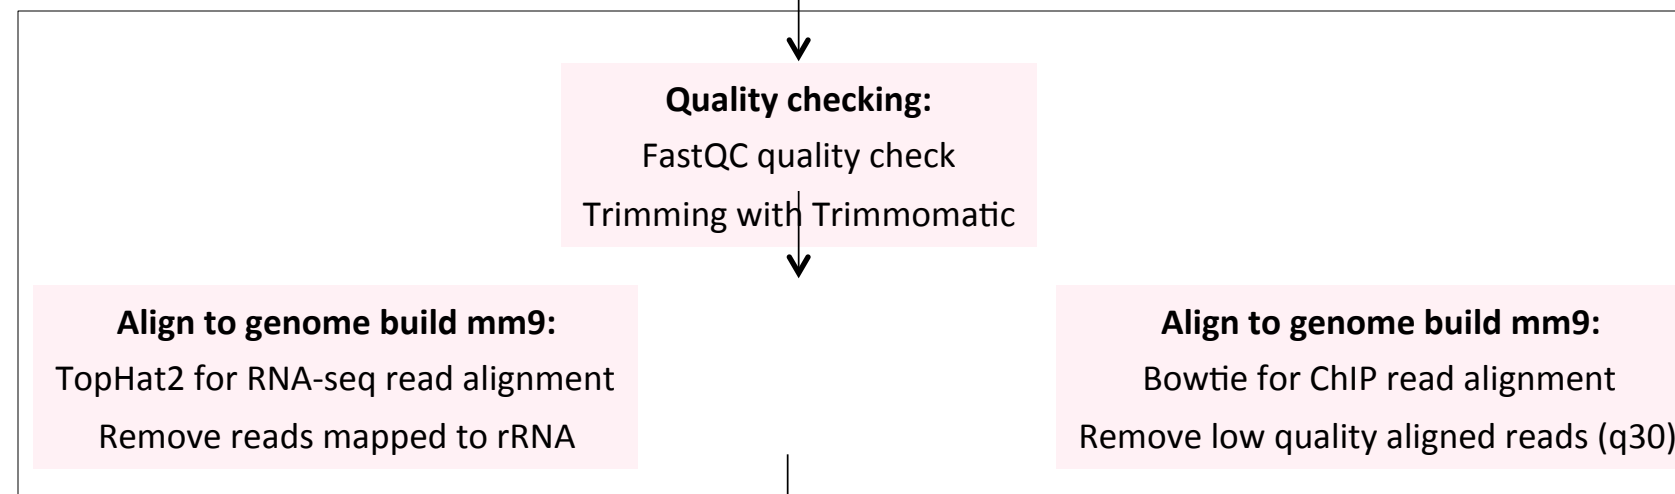

Output: Aligned bam files

## RNA-seq:

Input: BA2 rep1, BA2 rep2, PBA rep1, PBA rep2 bam files

Splicing aware read counting:  
Cufflinks

Output: FPKM

Output: Raw Read Counts

Differential expression:  
edgeR

Output: Gene expression: FPKM values

Output: Differentially expressed genes

## ChIP-seq peak calling:

Input: IP bam

Input: Input bam

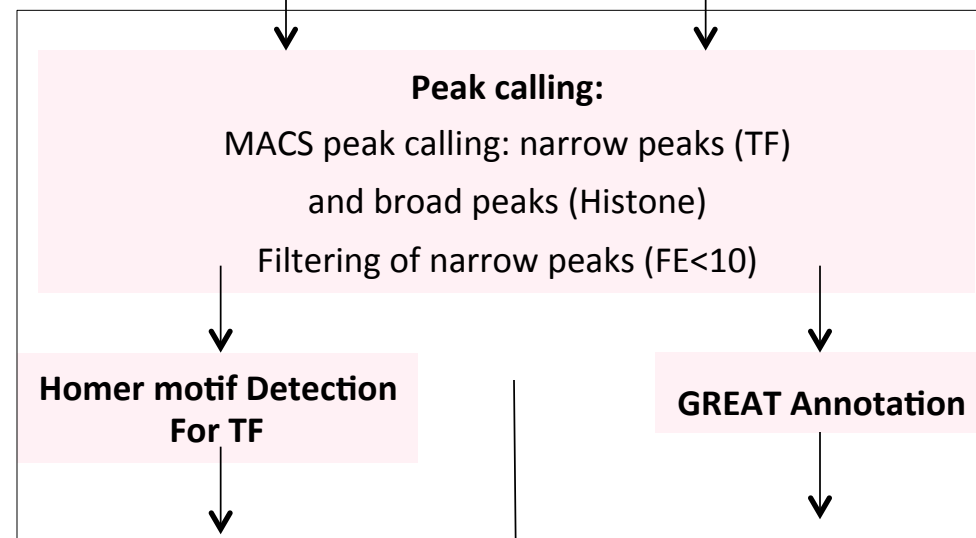

Output: Binding site motif

Output: Peaks

Output: Annotation

## Meis differential binding sites:

Input: Meis PBA IP bam files

Input: Meis BA2 IP bam files

Differential binding:  
diffReps with replicates  
Remove Fold change < log3

Output: Meis PBA>BA2

Intersect with Meis  
Peaks FE>=10

Input: Meis PBA peaks

Output: High Confidence Meis binding higher in PBA
